# Supplementary material
Source: PubMed Central journal article supplement (PMC9067390)
Supplement: NIHMS1798624-supplement-Spplmntl_TABLE-4.pdf [file NIHMS1798624-supplement-Spplmntl_TABLE-4.pdf]

**Supplemental Table 4: Reactogenicity Per Dose Analysis for Unimputed Safety Population Data  
In Clinic Exam Data Local Endpoints  
Fisher's Exact Test Comparing TRT-8IM to TRT-8SQ**

| Adverse Event (AE) Endpoint | Dose | Fisher's<br>2-sided<br>P-value | Percent<br>with AE<br>in<br>TRT-8SQ | Percent<br>with AE<br>in<br>TRT-8IM |
|-----------------------------|------|--------------------------------|-------------------------------------|-------------------------------------|
| Warmth                      | 1    | <.0001                         | 28.69                               | 3.63                                |
|                             | 2    | <.0001                         | 40.56                               | 7.72                                |
|                             | 3    | <.0001                         | 32.26                               | 6.15                                |
|                             | 4    | <.0001                         | 38.79                               | 12.99                               |
|                             | 5    | <.0001                         | 34.25                               | 13.39                               |
|                             | 6    | <.0001                         | 39.53                               | 15.35                               |
|                             | 7    | <.0001                         | 50.76                               | 19.51                               |
|                             | 8    | <.0001                         | 49.40                               | 20.94                               |
| Tenderness                  | 1    | 0.0002                         | 63.49                               | 46.64                               |
|                             | 2    | <.0001                         | 72.11                               | 54.80                               |
|                             | 3    | 0.0002                         | 47.56                               | 31.02                               |
|                             | 4    | <.0001                         | 64.81                               | 41.88                               |
|                             | 5    | 0.0107                         | 53.36                               | 40.97                               |
|                             | 6    | 0.0002                         | 57.21                               | 38.71                               |
|                             | 7    | 0.0001                         | 61.22                               | 41.75                               |
|                             | 8    | 0.0002                         | 63.10                               | 43.52                               |
| Itching                     | 1    | 0.2213                         | 2.83                                | 1.21                                |
|                             | 2    | <.0001                         | 15.73                               | 1.63                                |
|                             | 3    | <.0001                         | 22.67                               | 4.12                                |
|                             | 4    | <.0001                         | 19.91                               | 6.55                                |
|                             | 5    | 0.0040                         | 17.27                               | 8.04                                |
|                             | 6    | <.0001                         | 22.43                               | 6.05                                |
|                             | 7    | 0.0001                         | 25.13                               | 10.19                               |
|                             | 8    | <.0001                         | 26.19                               | 9.42                                |
| Pain                        | 1    | 0.2000                         | 15.66                               | 20.48                               |
|                             | 2    | 0.5795                         | 21.69                               | 19.51                               |
|                             | 3    | 1.0000                         | 11.84                               | 12.20                               |
|                             | 4    | 0.4658                         | 19.21                               | 16.38                               |
|                             | 5    | 0.7898                         | 15.53                               | 14.22                               |
|                             | 6    | 0.8894                         | 13.49                               | 14.42                               |
|                             | 7    | 1.0000                         | 17.95                               | 18.05                               |
|                             | 8    | 0.6840                         | 19.76                               | 17.62                               |
| AML                         | 1    | 1.0000                         | 8.06                                | 8.43                                |

\*=TRT-8SQ>TRT-8IM, p<0.05, \*\*TRT-8IM>TRT-8SQ, p<0.05, NA=Not enough data

**Supplemental Table 4: Reactogenicity Per Dose Analysis for Unimputed Safety Population Data  
In Clinic Exam Data Local Endpoints  
Fisher's Exact Test Comparing TRT-8IM to TRT-8SQ**

| Adverse Event (AE) Endpoint | Dose | Fisher's<br>2-sided<br>P-value | Percent<br>with AE<br>in<br>TRT-8SQ | Percent<br>with AE<br>in<br>TRT-8IM |
|-----------------------------|------|--------------------------------|-------------------------------------|-------------------------------------|
|                             | 2    | 0.7848                         | 11.65                               | 12.50                               |
|                             | 3    | 1.0000                         | 5.33                                | 5.35                                |
|                             | 4    | 1.0000                         | 11.35                               | 11.69                               |
|                             | 5    | 0.5403                         | 9.59                                | 11.50                               |
|                             | 6    | 0.0066                         | 5.14                                | 13.08                               |
|                             | 7    | 0.4003                         | 8.21                                | 10.73                               |
|                             | 8    | 0.0095                         | 4.79                                | 13.09                               |
| Erythema                    | 1    | <.0001                         | 52.99                               | 14.00                               |
|                             | 2    | <.0001                         | 63.75                               | 23.89                               |
|                             | 3    | <.0001                         | 57.43                               | 23.36                               |
|                             | 4    | <.0001                         | 64.98                               | 33.19                               |
|                             | 5    | <.0001                         | 63.51                               | 39.82                               |
|                             | 6    | 0.0007                         | 63.59                               | 47.25                               |
|                             | 7    | <.0001                         | 67.51                               | 46.15                               |
|                             | 8    | <.0001                         | 71.01                               | 41.15                               |
| Induration                  | 1    | <.0001                         | 25.51                               | 5.65                                |
|                             | 2    | <.0001                         | 34.54                               | 9.76                                |
|                             | 3    | <.0001                         | 27.76                               | 8.57                                |
|                             | 4    | <.0001                         | 40.43                               | 12.66                               |
|                             | 5    | <.0001                         | 38.18                               | 12.50                               |
|                             | 6    | 0.0001                         | 36.11                               | 19.35                               |
|                             | 7    | <.0001                         | 37.76                               | 13.17                               |
|                             | 8    | 0.0002                         | 34.52                               | 17.28                               |
| Edema                       | 1    | <.0001                         | 17.27                               | 4.82                                |
|                             | 2    | <.0001                         | 33.20                               | 12.60                               |
|                             | 3    | <.0001                         | 31.05                               | 11.93                               |
|                             | 4    | 0.0014                         | 32.47                               | 19.13                               |
|                             | 5    | 0.1139                         | 31.36                               | 24.55                               |
|                             | 6    | 0.3043                         | 34.88                               | 29.95                               |
|                             | 7    | 0.5305                         | 36.92                               | 33.66                               |
|                             | 8    | <.0001                         | 45.51                               | 25.39                               |
| Nodule                      | 1    | <.0001                         | 38.55                               | 3.63                                |
|                             | 2    | <.0001                         | 42.17                               | 3.25                                |

\*=TRT-8SQ>TRT-8IM, p<0.05, \*\*TRT-8IM>TRT-8SQ, p<0.05, NA=Not enough data

**Supplemental Table 4: Reactogenicity Per Dose Analysis for Unimputed Safety Population Data  
In Clinic Exam Data Local Endpoints  
Fisher's Exact Test Comparing TRT-8IM to TRT-8SQ**

| Adverse Event (AE) Endpoint                      | Dose | Fisher's<br>2-sided<br>P-value | Percent<br>with AE<br>in<br>TRT-8SQ | Percent<br>with AE<br>in<br>TRT-8IM |
|--------------------------------------------------|------|--------------------------------|-------------------------------------|-------------------------------------|
|                                                  | 3    | <.0001                         | 35.89                               | 4.53                                |
|                                                  | 4    | <.0001                         | 25.76                               | 5.68                                |
|                                                  | 5    | <.0001                         | 26.24                               | 9.33                                |
|                                                  | 6    | <.0001                         | 23.15                               | 7.48                                |
|                                                  | 7    | 0.0002                         | 21.13                               | 7.77                                |
|                                                  | 8    | <.0001                         | 26.51                               | 3.66                                |
| Bruise                                           | 1    | 1.0000                         | 6.10                                | 6.45                                |
|                                                  | 2    | 0.2505                         | 7.26                                | 4.45                                |
|                                                  | 3    | 0.5464                         | 6.10                                | 4.53                                |
|                                                  | 4    | 0.5455                         | 6.11                                | 4.78                                |
|                                                  | 5    | 0.5410                         | 2.73                                | 1.79                                |
|                                                  | 6    | 0.1576                         | 6.05                                | 2.80                                |
|                                                  | 7    | 0.5318                         | 5.13                                | 6.83                                |
|                                                  | 8    | 0.0434                         | 6.06                                | 1.58                                |
| Presence or Absence of Local AEs                 | 1    | <.0001                         | 81.10                               | 57.81                               |
|                                                  | 2    | <.0001                         | 88.89                               | 67.73                               |
|                                                  | 3    | <.0001                         | 80.08                               | 52.82                               |
|                                                  | 4    | <.0001                         | 84.45                               | 64.26                               |
|                                                  | 5    | 0.0033                         | 81.33                               | 69.30                               |
|                                                  | 6    | 0.0002                         | 84.40                               | 69.37                               |
|                                                  | 7    | 0.0054                         | 84.34                               | 72.60                               |
|                                                  | 8    | <.0001                         | 91.76                               | 72.02                               |
| Presence or Absence of Moderate/Severe Local AEs | 1    | 0.3465                         | 6.88                                | 4.84                                |
|                                                  | 2    | 0.0026                         | 15.73                               | 6.91                                |
|                                                  | 3    | 0.0539                         | 8.16                                | 3.70                                |
|                                                  | 4    | 0.0383                         | 12.61                               | 6.52                                |
|                                                  | 5    | 0.0123                         | 9.55                                | 3.57                                |
|                                                  | 6    | 0.3117                         | 7.48                                | 4.67                                |
|                                                  | 7    | 0.0876                         | 11.86                               | 6.83                                |
|                                                  | 8    | 0.4249                         | 13.77                               | 10.94                               |
| Presence or Absence of Local Large AEs           | 1    | NA                             | 0.00                                | 0.00                                |
|                                                  | 2    | 1.0000                         | 0.81                                | 0.41                                |
|                                                  | 3    | 0.4171                         | 3.69                                | 2.06                                |

\*=TRT-8SQ>TRT-8IM, p<0.05, \*\*TRT-8IM>TRT-8SQ, p<0.05, NA=Not enough data

**Supplemental Table 4: Reactogenicity Per Dose Analysis for Unimputed Safety Population Data  
In Clinic Exam Data Local Endpoints  
Fisher's Exact Test Comparing TRT-8IM to TRT-8SQ**

| Adverse Event (AE) Endpoint | Dose | Fisher's 2-sided P-value | Percent with AE in TRT-8SQ | Percent with AE in TRT-8IM |
|-----------------------------|------|--------------------------|----------------------------|----------------------------|
|                             | 4    | 0.2157                   | 2.18                       | 0.44                       |
|                             | 5    | 0.1755                   | 0.91                       | 3.13                       |
|                             | 6    | 0.5751                   | 2.34                       | 3.72                       |
|                             | 7    | 0.3826                   | 2.06                       | 3.90                       |
|                             | 8    | 0.7783                   | 4.24                       | 3.16                       |

*\*=TRT-8SQ>TRT-8IM, p<0.05, \*\*TRT-8IM>TRT-8SQ, p<0.05, NA=Not enough data*
