# Supplementary material
Source: PubMed Central journal article supplement (PMC9067390)
Supplement: NIHMS1798624-supplement-Spplmntl_TABLE-5.pdf [file NIHMS1798624-supplement-Spplmntl_TABLE-5.pdf]

**Supplemental Table 5. Serious Adverse Events**

| Participant | Description of event                                                               | Status                                                                                                  | Outcome                                                                       | Last injection before onset of AE | Date of AE onset | Study Group |
|-------------|------------------------------------------------------------------------------------|---------------------------------------------------------------------------------------------------------|-------------------------------------------------------------------------------|-----------------------------------|------------------|-------------|
| 1           | Supraspinatous tendon tear                                                         | Received injections 1-4; Further injections discontinued prior to the event; Completed safety follow-up | Resolved following surgery and physical therapy                               | 12/11/2002                        | 2/25/2003        | 4-IM        |
| 2           | Generalized allergic reaction                                                      | Received injections 1-6; Further injections discontinued; Did not complete safety follow-up             | Resolved                                                                      | 09/01/2004                        | 09/01/2004       | 5-IM        |
| 3           | Bilateral pseudotumor cerebri with bilateral disc edema                            | Received injections 1-3; Further injections discontinued; Completed safety follow-up                    | Improvement noted following treatment                                         | 02/27/2004                        | 04/13/2004       | 4-IM        |
| 4           | New onset of generalized seizure; aqueductal stenosis                              | Received injections 1-6; Further injections discontinued; Completed safety follow-up                    | Maintaining without anti-seizure medication in September 2004                 | 08/18/2004                        | 09/27/2004       | 8-IM        |
| 5           | Bilateral ductal carcinoma of the breast                                           | Completed study prior to onset                                                                          | No follow-up available                                                        | 09/13/2006                        | 1/3/2007         | 8-SQ        |
| 6           | New onset bilateral arthralgia of the metacarpal joints; ANA positive <sup>†</sup> | Completed study prior to onset                                                                          | No follow-up available                                                        | 09/13/2006                        | 1/22/2006        | 5-IM        |
| 7           | Invasive ductal carcinoma of the breast                                            | Received injections 1-6; Further injections discontinued; Completed safety follow-up                    | Following mastectomy and chemotherapy; in remission 18 months after diagnosis | 09/14/2004                        | 12/23/2004       | SQ Placebo  |

\*Blinded review using World Health Organization causality assessment criteria

<sup>†</sup>ANA=anti-nuclear antibody;
